# Supplementary material for: Dietary intake of vitamin C and gastric cancer: a pooled analysis within the Stomach cancer Pooling (StoP) Project
Source: Springer Nature journal article supplement (doi:10.1007/s10120-024-01476-8), 2024-03-04
Supplement: MOESM1 [file 10120_2024_1476_MOESM1_ESM.pdf]

## **Dietary intake of vitamin C and gastric cancer: a pooled analysis within the Stomach cancer Pooling (StoP) Project**

Michele Sassano<sup>1</sup>, Monireh Sadat Seyyedsalehi<sup>1</sup>, Giulia Collatuzzo<sup>1</sup>, Claudio Pelucchi<sup>2</sup>, Rossella Bonzi<sup>2</sup>, Monica Ferraroni<sup>2</sup>, Domenico Palli<sup>3</sup>, Guo-Pei Yu<sup>4</sup>, Zuo-Feng Zhang<sup>5</sup>, Lizbeth López-Carrillo<sup>6</sup>, Nuno Lunet<sup>7,8,9</sup>, Samantha Morais<sup>7,8,9</sup>, David Zaridze<sup>10</sup>, Dmitry Maximovich<sup>10</sup>, Vicente Martín<sup>11,12</sup>, Gemma Castano-Vinyals<sup>11,13,14,15</sup>, Jesús Vioque<sup>11,16</sup>, Sandra González-Palacios<sup>11,16</sup>, Mary H. Ward<sup>17</sup>, Reza Malekzadeh<sup>18</sup>, Mohammadreza Pakseresht<sup>18,19,20</sup>, Raul Ulises Hernández-Ramírez<sup>21</sup>, Malaquias López-Cervantes<sup>22</sup>, Eva Negri<sup>1,2</sup>, Federica Turati<sup>2</sup>, Charles S. Rabkin<sup>17</sup>, Shoichiro Tsugane<sup>23,24</sup>, Akihisa Hidaka<sup>25,26</sup>, Areti Lagiou<sup>27</sup>, Pagona Lagiou<sup>28,29</sup>, M. Constanza Camargo<sup>17</sup>, Maria Paula Curado<sup>30</sup>, Carlo La Vecchia<sup>2</sup>, Paolo Boffetta<sup>1,31,32\*</sup>

1. Department of Medical and Surgical Sciences, University of Bologna, Bologna, Italy.
2. Department of Clinical Sciences and Community Health, University of Milan, Milan, Italy.
3. Cancer Risk Factors and Life-Style Epidemiology Unit, Institute for Cancer Research, Prevention and Clinical Network, ISPRO, Florence, Italy.
4. Medical Informatics Center, Peking University, Beijing, China.
5. Department of Epidemiology, UCLA Fielding School of Public Health and Jonsson Comprehensive Cancer Center, Los Angeles, CA, USA.
6. Mexico National Institute of Public Health, Cuernavaca, Mexico.
7. EPIUnit, Instituto de Saúde Pública da Universidade do Porto, Porto, Portugal.
8. Laboratório para a Investigação Integrativa e Translacional em Saúde Populacional (ITR), Porto, Portugal.
9. Departamento de Ciências da Saúde Pública e Forenses e Educação Médica, Faculdade de Medicina, Universidade do Porto, Porto, Portugal.
10. Department of Clinical Epidemiology, N.N. Blokhin National Medical Research Center for Oncology, Moscow, Russia.
11. Consortium for Biomedical Research in Epidemiology and Public Health (CIBERESP), Madrid, Spain.
12. Instituto de Biomedicina, Universidad de León, León, Spain.
13. Barcelona Institute for Global Health-ISGlobal, Barcelona, Spain.
14. IMIM (Hospital del Mar Medical Research Institute), Barcelona, Spain.
15. Universitat Pompeu Fabra (UPF), Barcelona, Spain.
16. Instituto de Investigación Sanitaria y Biomédica de Alicante, Universidad Miguel Hernandez (ISABIAL-UMH), Alicante, Spain.

17. Division of Cancer Epidemiology and Genetics, National Cancer Institute, National Institutes of Health, Rockville, MD, USA.
18. Digestive Oncology Research Center, Digestive Disease Research Institute, Tehran University of Medical Sciences, Tehran, Iran.
19. Department of Agricultural, Food and Nutritional Sciences, University of Alberta, Edmonton, Canada.
20. Nutritional Epidemiology Group, Centre for Epidemiology and Biostatistics, University of Leeds, Leeds, UK.
21. Department of Biostatistics, Yale School of Public Health, New Haven, CT, USA.
22. Facultad de Medicina, National Autonomous University of Mexico (UNAM), Coyoacán, Mexico.
23. Division of Cohort Research, National Cancer Center Institute for Cancer Control, Tokyo, Japan.
24. International University of Health and Welfare Graduate School of Public Health, Tokyo, Japan.
25. Division of Epidemiology, National Cancer Center Institute for Cancer Control, Tokyo, Japan.
26. Department of Diabetes and Endocrinology, JCHO Tokyo Yamate Medical Centre, Tokyo, Japan.
27. Department of Public and Community Health, School of Public Health, University of West Attica, Athens, Greece.
28. Department of Hygiene, Epidemiology and Medical Statistics, School of Medicine, National and Kapodistrian University of Athens, Athens, Greece.
29. Department of Epidemiology, Harvard T.H. Chan School of Public Health, Boston, MA, USA.
30. Centro Internacional de Pesquisa, A. C. Camargo Cancer Center, São Paulo, Brasil.
31. Stony Brook Cancer Center, Stony Brooke University, Stony Brook, NY, USA.
32. Department of Family, Population and Preventive Medicine, Renaissance School of Medicine, Stony Brook University, Stony Brook, NY, USA.

\*Correspondence:

Paolo Boffetta

Department of Medical and Surgical Sciences

University of Bologna

Via Massarenti 9 - Bologna 40138, Italy

[paolo.boffetta@unibo.it](mailto:paolo.boffetta@unibo.it)

**Supplementary Table 1.** Main characteristics of the studies included in the analysis.

**Supplementary Table 2.** Study participants' characteristics, by study included in the analysis.

**Supplementary Table 3.** Results of the interaction analysis between dietary intake of vitamin C and other selected factors.

**Supplementary Figure 1.** Flowchart describing inclusion of studies and participants.

**Supplementary Figure 2.** E-value for the point estimate and the upper limit of the 95% confidence interval for the observed association between dietary intake of vitamin C and gastric cancer.

**Supplementary Table 1.** Main characteristics of the studies included in the analysis.

| Study label [ref] | Type of study   | Study period | n cases, by quartile (Q) of intake of vitamin C | n controls, by quartile (Q) of intake of vitamin C |
|-------------------|-----------------|--------------|-------------------------------------------------|----------------------------------------------------|
| Italy 1 [18]      | Clinic-based    | 1997-2007    | Q1: 57<br>Q2: 63<br>Q3: 63<br>Q4: 47            | Q1: 137<br>Q2: 137<br>Q3: 137<br>Q4: 136           |
| Italy 2 [19]      | Community-based | 1985-1987    | Q1: 335<br>Q2: 272<br>Q3: 208<br>Q4: 201        | Q1: 290<br>Q2: 292<br>Q3: 289<br>Q4: 288           |
| Greece [22]       | Clinic-based    | 1981-1984    | Q1: 47<br>Q2: 14<br>Q3: 16<br>Q4: 33            | Q1: 25<br>Q2: 25<br>Q3: 25<br>Q4: 25               |
| Russia [23]       | Clinic-based    | 1996-1997    | Q1: 109<br>Q2: 118<br>Q3: 111<br>Q4: 112        | Q1: 153<br>Q2: 153<br>Q3: 153<br>Q4: 152           |
| Iran [27]         | Community-based | 2005-2007    | Q1: 153<br>Q2: 75<br>Q3: 32<br>Q4: 24           | Q1: 76<br>Q2: 76<br>Q3: 76<br>Q4: 76               |
| China [25]        | Community-based | 1991-1993    | Q1: 171<br>Q2: 168<br>Q3: 173<br>Q4: 195        | Q1: 177<br>Q2: 176<br>Q3: 177<br>Q4: 176           |
| Portugal [24]     | Community-based | 1999-2006    | Q1: 259<br>Q2: 155<br>Q3: 144<br>Q4: 75         | Q1: 400<br>Q2: 400<br>Q3: 400<br>Q4: 400           |
| Spain 1 [20]      | Community-based | 2008-2012    | Q1: 94<br>Q2: 81<br>Q3: 85<br>Q4: 79            | Q1: 760<br>Q2: 760<br>Q3: 760<br>Q4: 760           |
| Spain 2 [21]      | Clinic-based    | 1995-1999    | Q1: 136<br>Q2: 114<br>Q3: 62<br>Q4: 86          | Q1: 114<br>Q2: 114<br>Q3: 114<br>Q4: 113           |
| Mexico 1 [29]     | Community-based | 2004-2005    | Q1: 28<br>Q2: 55<br>Q3: 77<br>Q4: 88            | Q1: 120<br>Q2: 119<br>Q3: 120<br>Q4: 119           |
| Mexico 2 [30]     | Community-based | 1989-1990    | Q1: 39<br>Q2: 65<br>Q3: 49<br>Q4: 67            | Q1: 188<br>Q2: 188<br>Q3: 188<br>Q4: 188           |
| Mexico 3 [31]     | Clinic-based    | 1994-1996    | Q1: 71<br>Q2: 50<br>Q3: 60<br>Q4: 53            | Q1: 117<br>Q2: 117<br>Q3: 117<br>Q4: 117           |
| Japan 3 [26]      | Clinic-based    | 1998-2002    | Q1: 52<br>Q2: 32<br>Q3: 28<br>Q4: 41            | Q1: 62<br>Q2: 82<br>Q3: 86<br>Q4: 73               |
| USA [28]          | Community-based | 1988-1993    | Q1: 45<br>Q2: 39<br>Q3: 44<br>Q4: 42            | Q1: 126<br>Q2: 125<br>Q3: 126<br>Q4: 125           |

Supplementary Table 2. Study participants' characteristics, by study included in the analysis.

| Characteristics                                | Study        |                 |              |                 |              |                 |              |                 |              |                 |              |                 |              |                 |              |                 |              |                 |              |                 |              |                 |              |                 |              |                 |              |                 |         |          |
|------------------------------------------------|--------------|-----------------|--------------|-----------------|--------------|-----------------|--------------|-----------------|--------------|-----------------|--------------|-----------------|--------------|-----------------|--------------|-----------------|--------------|-----------------|--------------|-----------------|--------------|-----------------|--------------|-----------------|--------------|-----------------|--------------|-----------------|---------|----------|
|                                                | Italy 1      |                 | Italy 2      |                 | Greece       |                 | Russia       |                 | Iran         |                 | China        |                 | Portugal     |                 | Spain 1      |                 | Spain 2      |                 | Mexico 1     |                 | Mexico 2     |                 | Mexico 3     |                 | Japan        |                 | USA          |                 |         |          |
|                                                | Cases, n (%) | Controls, n (%) | Cases, n (%) | Controls, n (%) | Cases, n (%) | Controls, n (%) | Cases, n (%) | Controls, n (%) | Cases, n (%) | Controls, n (%) | Cases, n (%) | Controls, n (%) | Cases, n (%) | Controls, n (%) | Cases, n (%) | Controls, n (%) | Cases, n (%) | Controls, n (%) | Cases, n (%) | Controls, n (%) | Cases, n (%) | Controls, n (%) | Cases, n (%) | Controls, n (%) | Cases, n (%) | Controls, n (%) | Cases, n (%) | Controls, n (%) |         |          |
| <b>Sex</b>                                     |              |                 |              |                 |              |                 |              |                 |              |                 |              |                 |              |                 |              |                 |              |                 |              |                 |              |                 |              |                 |              |                 |              |                 |         |          |
| Male                                           | 83 (62.2)    | 286 (52.3)      | 540 (63.0)   | 705 (60.8)      | 57 (51.8)    | 49 (49.0)       | 248 (55.1)   | 293 (48.0)      | 210 (73.4)   | 217 (71.4)      | 453 (63.7)   | 453 (63.7)      | 417 (60.3)   | 783 (47.0)      | 290 (65.8)   | 1,892 (55.0)    | 266 (66.3)   | 285 (62.6)      | 134 (54.0)   | 258 (54.0)      | 122 (55.5)   | 296 (39.4)      | 33 (56.8)    | 266 (56.8)      | 108 (70.6)   | 215 (71.0)      | 37 (57.1)    | 284 (56.6)      |         |          |
| Female                                         | 87 (37.8)    | 261 (47.7)      | 376 (37.0)   | 454 (39.2)      | 53 (48.2)    | 51 (51.0)       | 202 (44.9)   | 318 (52.1)      | 76 (26.6)    | 87 (28.6)       | 258 (36.3)   | 258 (36.3)      | 275 (39.7)   | 884 (53.0)      | 151 (34.2)   | 1,548 (45.0)    | 135 (33.7)   | 170 (37.9)      | 114 (46.0)   | 220 (46.0)      | 88 (44.5)    | 456 (60.6)      | 01 (43.2)    | 202 (43.2)      | 45 (29.4)    | 88 (29.0)       | 73 (42.9)    | 218 (43.4)      |         |          |
| <b>Age, years</b>                              |              |                 |              |                 |              |                 |              |                 |              |                 |              |                 |              |                 |              |                 |              |                 |              |                 |              |                 |              |                 |              |                 |              |                 |         |          |
| ≤40                                            | 11 (4.8)     | 28 (5.1)        | 25 (2.5)     | 39 (3.4)        | 7 (6.4)      | 6 (6.0)         | 12 (2.7)     | 61 (10.0)       | 8 (2.8)      | 4 (1.3)         | 49 (6.9)     | 50 (7.0)        | 36 (5.2)     | 154 (9.2)       | 14 (3.2)     | 100 (2.9)       | 10 (2.5)     | 13 (2.9)        | 35 (14.1)    | 64 (13.4)       | 32 (14.6)    | 86 (11.4)       | 80 (12.8)    | 63 (13.5)       | 7 (4.6)      | 18 (5.9)        | 2 (1.2)      | 47 (9.4)        |         |          |
| 41-50                                          | 33 (14.4)    | 83 (15.2)       | 90 (8.9)     | 102 (8.8)       | 9 (8.2)      | 19 (19.0)       | 56 (12.4)    | 160 (26.2)      | 16 (5.6)     | 43 (14.1)       | 59 (8.3)     | 62 (8.7)        | 105 (15.2)   | 372 (22.3)      | 34 (7.7)     | 405 (11.8)      | 44 (11.0)    | 53 (11.7)       | 39 (15.7)    | 67 (14.0)       | 40 (18.2)    | 113 (15.0)      | 37 (15.8)    | 73 (15.6)       | 30 (19.6)    | 49 (16.2)       | 7 (4.1)      | 47 (9.4)        |         |          |
| 51-60                                          | 58 (25.2)    | 134 (24.5)      | 213 (21.0)   | 240 (20.7)      | 18 (16.4)    | 25 (25.0)       | 109 (24.2)   | 175 (28.6)      | 57 (19.9)    | 77 (25.3)       | 141 (19.8)   | 130 (18.3)      | 130 (18.8)   | 363 (21.8)      | 90 (20.4)    | 652 (19.0)      | 70 (17.5)    | 97 (21.3)       | 55 (22.2)    | 114 (23.9)      | 38 (17.3)    | 182 (24.2)      | 53 (22.7)    | 114 (24.4)      | 44 (28.8)    | 103 (34.0)      | 11 (6.5)     | 53 (10.6)       |         |          |
| 61-70                                          | 89 (38.7)    | 210 (38.4)      | 397 (39.1)   | 432 (37.3)      | 41 (37.3)    | 30 (30.0)       | 188 (41.8)   | 158 (25.9)      | 88 (30.8)    | 92 (30.3)       | 271 (38.1)   | 293 (41.2)      | 182 (26.3)   | 437 (26.2)      | 106 (24.0)   | 1,174 (34.1)    | 133 (33.2)   | 169 (37.1)      | 75 (30.2)    | 126 (26.4)      | 80 (36.4)    | 214 (28.5)      | 70 (29.9)    | 138 (29.5)      | 70 (45.8)    | 122 (40.3)      | 32 (18.8)    | 90 (17.9)       |         |          |
| >70                                            | 39 (17.0)    | 92 (16.8)       | 291 (28.6)   | 346 (29.9)      | 35 (31.8)    | 20 (20.0)       | 85 (18.9)    | 57 (9.3)        | 117 (40.9)   | 88 (29.0)       | 191 (26.9)   | 176 (24.8)      | 239 (34.5)   | 341 (20.5)      | 197 (44.7)   | 1,109 (32.2)    | 144 (35.9)   | 123 (27.0)      | 44 (17.7)    | 107 (22.4)      | 30 (13.6)    | 157 (20.9)      | 44 (18.8)    | 80 (17.1)       | 2 (1.3)      | 11 (3.6)        | 118 (69.4)   | 261 (52.0)      |         |          |
| Missing                                        | 0 (0.0)      | 0 (0.0)         | 0 (0.0)      | 0 (0.0)         | 0 (0.0)      | 0 (0.0)         | 0 (0.0)      | 0 (0.0)         | 0 (0.0)      | 0 (0.0)         | 0 (0.0)      | 0 (0.0)         | 0 (0.0)      | 0 (0.0)         | 0 (0.0)      | 0 (0.0)         | 0 (0.0)      | 0 (0.0)         | 0 (0.0)      | 0 (0.0)         | 0 (0.0)      | 0 (0.0)         | 0 (0.0)      | 0 (0.0)         | 0 (0.0)      | 0 (0.0)         | 0 (0.0)      | 0 (0.0)         | 0 (0.0) |          |
| <b>Socioeconomic status</b>                    |              |                 |              |                 |              |                 |              |                 |              |                 |              |                 |              |                 |              |                 |              |                 |              |                 |              |                 |              |                 |              |                 |              |                 |         |          |
| Low                                            | 95 (41.3)    | 236 (43.1)      | 817 (80.4)   | 797 (68.8)      | 91 (82.7)    | 67 (67.0)       | 27 (6.0)     | 25 (4.1)        | 93 (32.5)    | 69 (22.7)       | 478 (67.2)   | 447 (62.9)      | 552 (79.8)   | 752 (45.1)      | 603 (68.7)   | 1,802 (52.4)    | 367 (91.5)   | 418 (91.9)      | 61 (24.6)    | 159 (33.3)      | 48 (21.8)    | 200 (26.6)      | 55 (27.8)    | 149 (31.8)      | 58 (37.9)    | 105 (34.7)      | 17 (10.0)    | 23 (4.6)        |         |          |
| Intermediate                                   | 86 (37.4)    | 174 (31.8)      | 167 (16.4)   | 287 (24.8)      | 10 (9.1)     | 6 (6.0)         | 382 (84.9)   | 537 (87.9)      | 159 (55.6)   | 172 (56.6)      | 196 (27.6)   | 228 (32.1)      | 94 (13.6)    | 362 (21.7)      | 91 (20.6)    | 951 (27.7)      | 97 (10.7)    | 683 (19.9)      | 98 (39.5)    | 180 (37.7)      | 37 (35.0)    | 337 (44.8)      | 99 (42.3)    | 205 (43.8)      | 53 (41.2)    | 134 (44.2)      | 112 (65.9)   | 274 (54.6)      |         |          |
| High                                           | 46 (20.0)    | 133 (24.3)      | 17 (1.7)     | 61 (5.3)        | 9 (8.2)      | 26 (26.0)       | 36 (8.0)     | 42 (6.9)        | 84 (11.9)    | 63 (20.7)       | 33 (4.6)     | 30 (4.2)        | 97 (5.4)     | 550 (33.0)      | 17 (3.9)     | 5 (0.0)         | 1 (0.3)      | 7 (1.5)         | 89 (35.0)    | 139 (29.1)      | 51 (23.2)    | 149 (19.8)      | 55 (27.8)    | 110 (23.5)      | 31 (20.3)    | 62 (20.5)       | 40 (23.5)    | 174 (34.7)      |         |          |
| Missing                                        | 3 (1.3)      | 4 (0.7)         | 15 (1.5)     | 14 (1.2)        | 0 (0.0)      | 1 (1.0)         | 5 (1.1)      | 7 (1.2)         | 0 (0.0)      | 0 (0.0)         | 4 (0.6)      | 6 (0.8)         | 9 (1.3)      | 3 (0.2)         | 0 (0.0)      | 4 (0.1)         | 1 (0.3)      | 0 (0.0)         | 0 (0.0)      | 0 (0.0)         | 44 (20.0)    | 66 (8.8)        | 5 (2.1)      | 4 (0.9)         | 1 (0.7)      | 2 (0.7)         | 1 (0.6)      | 31 (6.2)        |         |          |
| <b>Body mass index</b>                         |              |                 |              |                 |              |                 |              |                 |              |                 |              |                 |              |                 |              |                 |              |                 |              |                 |              |                 |              |                 |              |                 |              |                 |         |          |
| Underweight (<18.5 kg/m <sup>2</sup> )         | 2 (0.9)      | 13 (2.4)        | 28 (2.8)     | 25 (2.2)        | 2 (1.8)      | 1 (1.0)         | 26 (5.8)     | 10 (1.6)        | 9 (3.2)      | 4 (1.3)         | 0 (0.0)      | 0 (0.0)         | 5 (0.4)      | 16 (1.0)        | 3 (0.7)      | 36 (1.1)        | 29 (7.2)     | 8 (1.8)         | 23 (9.3)     | 0 (0.0)         | 0 (0.0)      | 0 (0.0)         | 0 (0.0)      | 0 (0.0)         | 0 (0.0)      | 0 (0.0)         | 12 (7.8)     | 2 (0.7)         | 3 (1.8) | 14 (2.8) |
| Normal weight (18.5 – 24.9 kg/m <sup>2</sup> ) | 116 (50.4)   | 236 (43.1)      | 553 (54.4)   | 580 (50.0)      | 50 (45.5)    | 39 (39.0)       | 210 (46.7)   | 189 (30.9)      | 190 (66.4)   | 106 (34.9)      | 3 (0.4)      | 2 (0.3)         | 211 (30.5)   | 515 (30.9)      | 121 (27.4)   | 1,105 (32.1)    | 175 (43.6)   | 126 (27.7)      | 131 (52.8)   | 0 (0.0)         | 0 (0.0)      | 0 (0.0)         | 0 (0.0)      | 0 (0.0)         | 100 (65.4)   | 202 (66.7)      | 59 (40.6)    | 245 (48.8)      |         |          |
| Overweight (25 – 29.9 kg/m <sup>2</sup> )      | 82 (35.7)    | 223 (40.8)      | 349 (34.4)   | 452 (39.0)      | 38 (34.6)    | 45 (45.0)       | 101 (22.4)   | 194 (31.8)      | 57 (19.9)    | 125 (41.1)      | 44 (6.2)     | 37 (5.2)        | 255 (36.9)   | 726 (43.6)      | 392 (43.5)   | 1,279 (37.2)    | 95 (23.7)    | 181 (39.8)      | 73 (29.4)    | 0 (0.0)         | 0 (0.0)      | 0 (0.0)         | 0 (0.0)      | 0 (0.0)         | 59 (25.5)    | 97 (32.0)       | 71 (41.8)    | 175 (34.9)      |         |          |
| Obese (≥30 kg/m <sup>2</sup> )                 | 26 (11.3)    | 73 (13.4)       | 86 (8.5)     | 102 (8.8)       | 15 (13.6)    | 14 (14.0)       | 40 (8.9)     | 106 (17.4)      | 18 (6.3)     | 68 (22.4)       | 559 (92.7)   | 669 (94.1)      | 138 (19.9)   | 383 (23.0)      | 98 (22.2)    | 638 (18.6)      | 19 (4.7)     | 81 (17.8)       | 21 (8.5)     | 0 (0.0)         | 0 (0.0)      | 0 (0.0)         | 0 (0.0)      | 0 (0.0)         | 2 (1.3)      | 2 (0.7)         | 22 (12.9)    | 55 (11.0)       |         |          |
| Missing                                        | 4 (1.7)      | 2 (0.4)         | 0 (0.0)      | 0 (0.0)         | 5 (4.6)      | 1 (1.0)         | 73 (16.2)    | 112 (18.3)      | 5 (0.7)      | 3 (0.4)         | 85 (12.3)    | 27 (1.6)        | 27 (6.1)     | 382 (11.1)      | 27 (6.1)     | 382 (11.1)      | 83 (20.7)    | 59 (13.0)       | 0 (0.0)      | 478 (100.0)     | 220 (100.0)  | 752 (100.0)     | 234 (100.0)  | 468 (100.0)     | 3 (0.0)      | 0 (0.0)         | 5 (2.9)      | 13 (2.6)        |         |          |
| <b>Tobacco smoking status</b>                  |              |                 |              |                 |              |                 |              |                 |              |                 |              |                 |              |                 |              |                 |              |                 |              |                 |              |                 |              |                 |              |                 |              |                 |         |          |
| Never                                          | 96 (41.7)    | 261 (47.7)      | 359 (35.3)   | 413 (35.6)      | 55 (50.0)    | 49 (49.0)       | 241 (53.6)   | 345 (56.5)      | 172 (60.1)   | 196 (64.5)      | 373 (52.5)   | 415 (58.4)      | 386 (55.8)   | 873 (52.4)      | 84 (41.7)    | 1,511 (43.9)    | 165 (41.2)   | 218 (47.9)      | 118 (47.6)   | 232 (48.5)      | 84 (38.2)    | 398 (52.9)      | 33 (56.8)    | 258 (55.1)      | 52 (34.0)    | 148 (48.8)      | 87 (51.2)    | 230 (45.8)      |         |          |
| Former                                         | 71 (30.9)    | 163 (29.8)      | 285 (28.1)   | 381 (32.9)      | 14 (12.7)    | 6 (6.0)         | 137 (16.2)   | 87 (14.2)       | 83 (11.7)    | 45 (14.8)       | 135 (19.0)   | 83 (11.7)       | 162 (23.4)   | 376 (22.6)      | 55 (35.2)    | 1,216 (35.4)    | 57 (21.7)    | 114 (25.1)      | 110 (44.4)   | 128 (26.8)      | 0 (0.0)      | 0 (0.0)         | 74 (31.6)    | 115 (24.6)      | 46 (30.1)    | 73 (24.1)       | 70 (41.2)    | 189 (37.7)      |         |          |
| Current                                        | 60 (26.1)    | 122 (22.3)      | 329 (32.4)   | 335 (28.9)      | 41 (37.3)    | 45 (45.0)       | 131 (29.1)   | 177 (29.0)      | 71 (24.8)    | 63 (20.7)       | 202 (28.4)   | 212 (29.8)      | 121 (17.5)   | 361 (21.7)      | 98 (22.2)    | 664 (19.3)      | 149 (37.2)   | 123 (27.0)      | 37 (6.2)     | 104 (21.8)      | 125 (56.8)   | 340 (45.2)      | 21 (9.0)     | 88 (18.8)       | 52 (34.0)    | 78 (25.7)       | 8 (4.7)      | 63 (12.6)       |         |          |
| Missing                                        | 3 (1.3)      | 1 (0.2)         | 43 (4.2)     | 30 (2.6)        | 0 (0.0)      | 0 (0.0)         | 5 (1.1)      | 2 (0.3)         | 0 (0.0)      | 0 (0.0)         | 1 (0.1)      | 1 (0.1)         | 23 (3.3)     | 57 (3.4)        | 4 (0.9)      | 49 (1.4)        | 0 (0.0)      | 0 (0.0)         | 1 (1.9)      | 14 (2.9)        | 11 (5.0)     | 14 (11.9)       | 5 (2.6)      | 7 (1.5)         | 3 (2.0)      | 4 (1.3)         | 5 (2.9)      | 20 (4.0)        |         |          |
| <b>Alcohol drinking status</b>                 |              |                 |              |                 |              |                 |              |                 |              |                 |              |                 |              |                 |              |                 |              |                 |              |                 |              |                 |              |                 |              |                 |              |                 |         |          |
| Never                                          | 38 (16.5)    | 125 (22.9)      | 132 (13.0)   | 161 (13.9)      | 27 (24.6)    | 45 (45.0)       | 101 (22.4)   | 166 (27.2)      | 278 (97.2)   | 297 (97.7)      | 438 (61.6)   | 452 (63.6)      | 83 (12.0)    | 266 (16.0)      | 88 (13.2)    | 514 (14.9)      | 135 (33.7)   | 178 (39.1)      | 126 (50.8)   | 302 (63.2)      | 91 (41.4)    | 467 (62.1)      | 112 (47.9)   | 225 (48.1)      | 52 (34.0)    | 89 (29.4)       | 73 (42.9)    | 195 (38.8)      |         |          |
| Ever                                           | 192 (83.5)   | 422 (77.2)      | 884 (87.0)   | 998 (86.1)      | 83 (75.5)    | 55 (55.0)       | 344 (76.4)   | 440 (72.0)      | 8 (2.8)      | 7 (2.3)         | 273 (38.4)   | 255 (35.9)      | 586 (84.7)   | 1,344 (80.6)    | 271 (61.5)   | 2,262 (65.8)    | 266 (66.3)   | 277 (60.9)      | 122 (49.2)   | 176 (36.8)      | 129 (58.6)   | 285 (37.9)      | 22 (52.1)    | 243 (51.9)      | 101 (66.0)   | 214 (70.6)      | 66 (56.5)    | 299 (59.6)      |         |          |
| Missing                                        | 0 (0.0)      | 0 (0.0)         | 0 (0.0)      | 0 (0.0)         | 0 (0.0)      | 0 (0.0)         | 5 (1.1)      | 5 (0.8)         | 0 (0.0)      | 0 (0.0)         | 0 (0.0)      | 4 (0.6)         | 23 (3.3)     | 57 (3.4)        | 112 (25.4)   | 664 (19.3)      | 0 (0.0)      | 0 (0.0)         | 0 (0.0)      | 0 (0.0)         | 0 (0.0)      | 0 (0.0)         | 0 (0.0)      | 0 (0.0)         | 0 (0.0)      | 0 (0.0)         | 1 (0.6)      | 8 (1.6)         |         |          |
| <b>Subsite</b>                                 |              |                 |              |                 |              |                 |              |                 |              |                 |              |                 |              |                 |              |                 |              |                 |              |                 |              |                 |              |                 |              |                 |              |                 |         |          |
| Cardia                                         | 10 (4.4)     | 29 (6.8)        | 0 (0.0)      | 0 (0.0)         | 0 (0.0)      | 0 (0.0)         | 92 (20.4)    | 0 (0.0)         | 55 (22.7)    | 0 (0.0)         | 0 (0.0)      | 78 (11.3)       | 0 (0.0)      | 0 (0.0)         | 95 (21.5)    | 0 (0.0)         | 31 (7.7)     | 0 (0.0)         | 0 (0.0)      | 0 (0.0)         | 0 (0.0)      | 0 (0.0)         | 0 (0.0)      | 0 (0.0)         | 21 (13.7)    | 84 (20.0)       | 0 (0.0)      | 0 (0.0)         |         |          |
| Noncardia                                      | 92 (40.0)    | 247 (93.2)      | 0 (0.0)      | 0 (0.0)         | 90 (81.8)    | 0 (0.0)         | 201 (44.7)   | 0 (0.0)         | 221 (77.3)   | 0 (0.0)         | 0 (0.0)      | 546 (78.9)      | 0 (0.0)      | 0 (0.0)         | 332 (75.3)   | 261 (65.1)      | 61 (65.1)    | 0 (0.0)         | 111 (44.8)   | 0 (0.0)         | 0 (0.0)      | 0 (0.0)         | 0 (0.0)      | 0 (0.0)         | 126 (82.4)   | 07 (62.9)       | 0 (0.0)      | 0 (0.0)         |         |          |
| Missing                                        | 128 (55.7)   | 0 (0.0)         | 0 (0.0)      | 0 (0.0)         | 20 (18.2)    | 0 (0.0)         | 157 (34.9)   | 0 (0.0)         | 0 (0.0)      | 0 (0.0)         | 711 (100.0)  | 0 (0.0)         | 68 (9.8)     | 0 (0.0)         | 14 (3.2)     | 0 (0.0)         | 109 (27.2)   | 2 (0.8)         | 0 (0.0)      | 220 (100.0)     | 0 (0.0)      | 0 (0.0)         | 234 (100.0)  | 5 (3.9)         | 29 (17.1)    | 0 (0.0)         | 0 (0.0)      |                 |         |          |
| <b>Histological type</b>                       |              |                 |              |                 |              |                 |              |                 |              |                 |              |                 |              |                 |              |                 |              |                 |              |                 |              |                 |              |                 |              |                 |              |                 |         |          |
| Intestinal                                     | 33 (14.4)    | 0 (0.0)         | 510 (50.2)   | 0 (0.0)         | 0 (0.0)      | 0 (0.0)         | 121 (26.9)   | 0 (0.0)         | 148 (51.8)   | 0 (0.0)         | 0 (0.0)      | 286 (41.3)      | 0 (0.0)      | 0 (0.0)         | 168 (38.1)   | 0 (0.0)         | 243 (60.6)   | 0 (0.0)         | 92 (37.1)    | 0 (0.0)         | 0 (0.0)      | 0 (0.0)         | 80 (34.2)    | 0 (0.0)         | 0 (0.0)      | 89 (52.4)       | 0 (0.0)      | 0 (0.0)         |         |          |
| Diffuse                                        | 57 (24.8)    | 216 (21.3)      | 0 (0.0)      | 0 (0.0)         | 0 (0.0)      | 0 (0.0)         | 119 (26.4)   | 0 (0.0)         | 88 (23.8)    | 0 (0.0)         | 0 (0.0)      | 146 (21.1)      | 0 (0.0)      | 0 (0.0)         | 103 (24.3)   | 0 (0.0)         | 109 (27.2)   | 0 (0.0)         | 155 (62.5    |                 |              |                 |              |                 |              |                 |              |                 |         |          |

**Supplementary Table 3.** Results of the interaction analysis between dietary intake of vitamin C and other selected factors.

| Stratum                                | Intake of vitamin C               |                                  | RERI (95% CI)       | AP (95% CI)         |
|----------------------------------------|-----------------------------------|----------------------------------|---------------------|---------------------|
|                                        | Higher than median<br>OR (95% CI) | Lower than median<br>OR (95% CI) |                     |                     |
| <b>Age</b>                             |                                   |                                  | -0.01 (-0.19, 0.16) | -0.01 (-0.14, 0.12) |
| ≤60 years                              | 1.00 (ref)                        | 1.13 (0.99, 1.29)                |                     |                     |
| >60 years                              | 1.25 (1.12, 1.40)                 | 1.37 (1.20, 1.55)                |                     |                     |
| <b>Sex</b>                             |                                   |                                  | 0.07 (-0.09, 0.24)  | 0.05 (-0.07, 0.18)  |
| Female                                 | 1.00 (ref)                        | 1.07 (0.94, 1.22)                |                     |                     |
| Male                                   | 1.17 (1.03, 1.32)                 | 1.31 (1.15, 1.49)                |                     |                     |
| <b>Socioeconomic status</b>            |                                   |                                  | 0.22 (-0.03, 0.47)  | 0.11 (-0.02, 0.24)  |
| High                                   | 1.00 (ref)                        | 1.04 (0.83, 1.29)                |                     |                     |
| Low/intermediate                       | 1.76 (1.50, 2.06)                 | 2.02 (1.70, 2.39)                |                     |                     |
| <b>Tobacco smoking status</b>          |                                   |                                  | -0.10 (-0.28, 0.07) | -0.10 (-0.27, 0.07) |
| Non-current                            | 1.00 (ref)                        | 1.13 (1.01, 1.26)                |                     |                     |
| Current                                | 1.01 (0.89, 1.15)                 | 1.04 (0.91, 1.19)                |                     |                     |
| <b>Alcohol drinking status</b>         |                                   |                                  | 0.02 (-0.16, 0.19)  | 0.01 (-0.12, 0.15)  |
| Never                                  | 1.00 (ref)                        | 1.11 (0.96, 1.28)                |                     |                     |
| Ever                                   | 1.12 (0.99, 1.28)                 | 1.25 (1.08, 1.43)                |                     |                     |
| <b>BMI</b>                             |                                   |                                  | 0.35 (0.12, 0.58)   | 0.19 (0.08, 0.31)   |
| Overweight/obese                       | 1.00 (ref)                        | 1.10 (0.97, 1.24)                |                     |                     |
| Normal weight                          | 1.35 (1.19, 1.53)                 | 1.80 (1.56, 2.06)                |                     |                     |
| <b><i>H. pylori</i> seropositivity</b> |                                   |                                  | 0.14 (-0.19, 0.46)  | 0.11 (-0.15, 0.36)  |
| Negative                               | 1.00 (ref)                        | 1.10 (0.82, 1.48)                |                     |                     |

|                                       |                   |                   |                    |                    |
|---------------------------------------|-------------------|-------------------|--------------------|--------------------|
| Positive                              | 1.08 (0.86, 1.37) | 1.32 (1.02, 1.71) |                    |                    |
| <b>Intake of fruit and vegetables</b> |                   |                   | 0.13 (-0.10, 0.37) | 0.09 (-0.07, 0.25) |
| High                                  | 1.00 (ref)        | 1.15 (0.96, 1.36) |                    |                    |
| Intermediate/low                      | 1.22 (1.09, 1.37) | 1.50 (1.36, 1.65) |                    |                    |
| <b>Intake of salt</b>                 |                   |                   | 0.16 (-0.17, 0.49) | 0.09 (-0.10, 0.29) |
| Low                                   | 1.00 (ref)        | 1.28 (1.12, 1.47) |                    |                    |
| Intermediate/high                     | 1.24 (1.03, 1.50) | 1.68 (1.39, 2.03) |                    |                    |

RERI: relative excess risk due to interaction, AP: attributable proportion due to interaction, OR: odds ratio, CI: confidence interval, BMI: body mass index

**Supplementary Figure 1.** Flowchart describing inclusion of studies and participants.

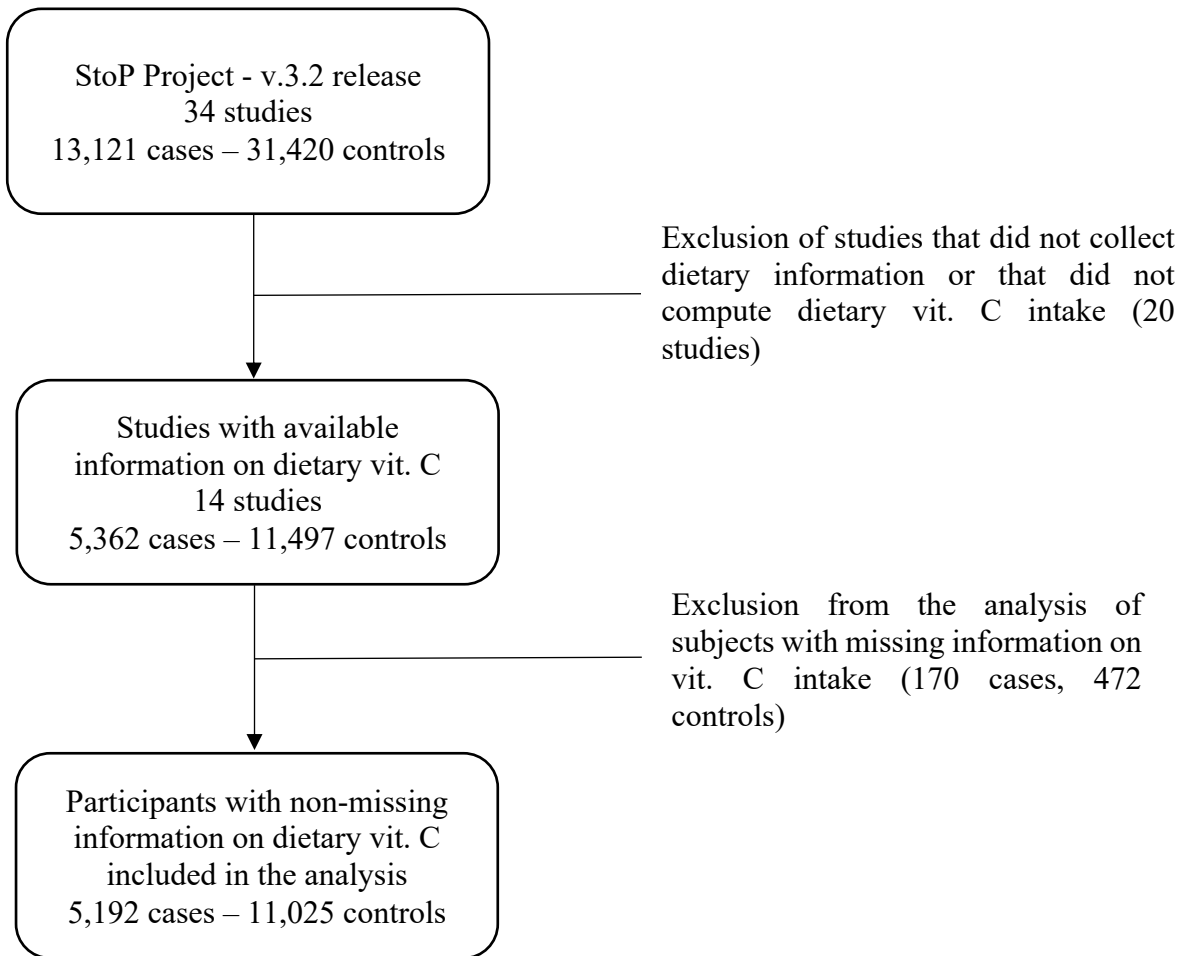



**Supplementary Figure 2.** E-value for the point estimate and the upper limit of the 95% confidence interval for the observed association between dietary intake of vitamin C and gastric cancer.

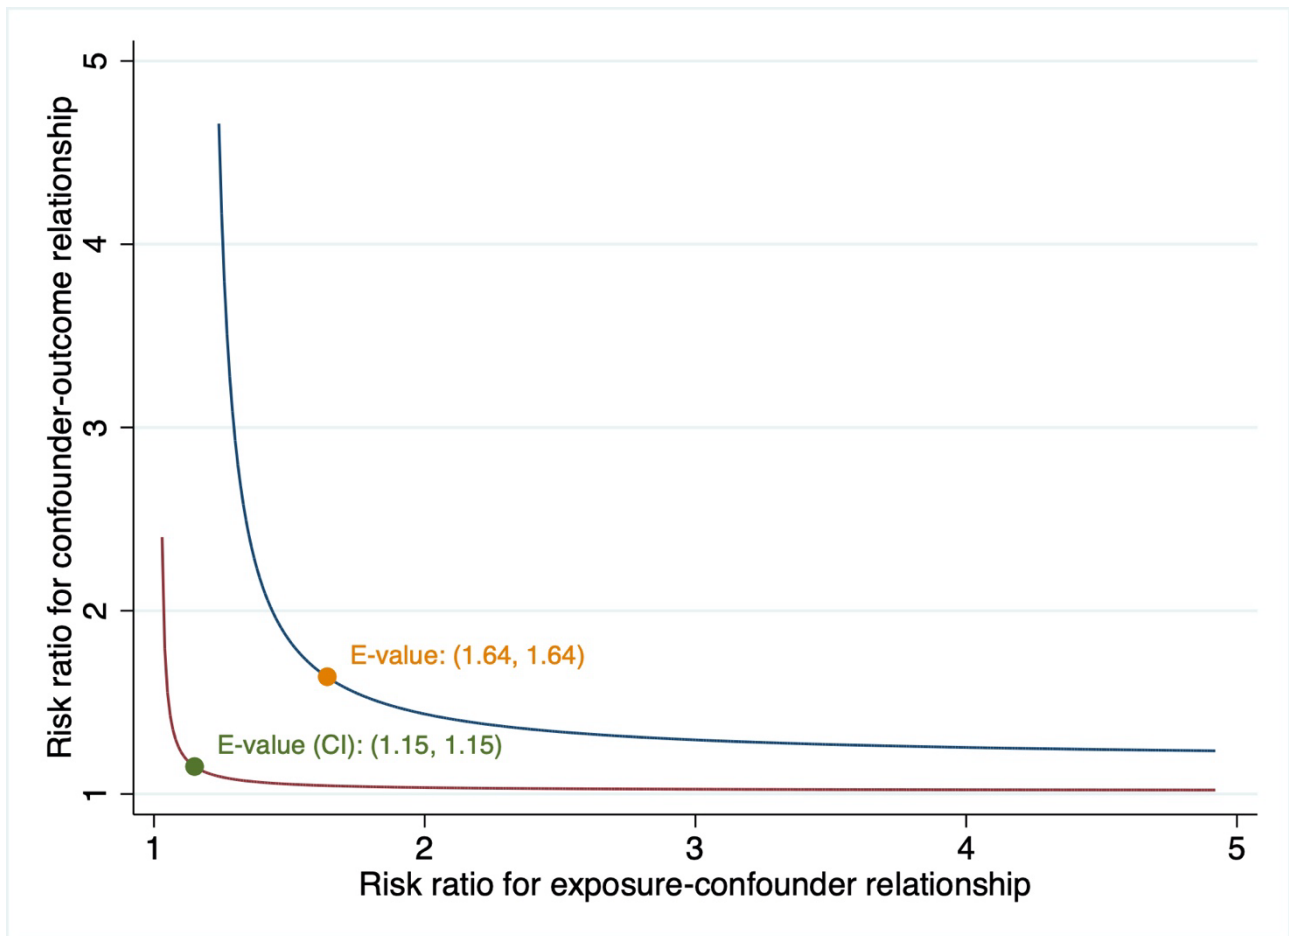

Computation of the E-value was based on estimates from Model 2 (adjusted for sex [male, female], age [ $\leq 40$  years, 41-50 years, 51-60 years, 61-70 years,  $> 70$  years, missing], socioeconomic status [low, intermediate, high, missing], tobacco smoking status [never, former, current, missing], alcohol drinking status [never, ever, missing], body mass index [underweight, normal weight, overweight, obese, missing], intake of fruit and vegetables [low, intermediate, high, missing], total energy intake [continuous]).
